# Supplementary material for: Functional and Metagenomic Evaluation of Ibezapolstat for Early Evaluation of Anti-Recurrence Effects in Clostridioides difficile Infection
Source: PubMed Central journal article supplement (PMC9380534; doi:10.1128/aac.02244-21), 2022-07-06

Supplemental Figure 1. Bile acid concentrations from IBZ- and VAN-treated subjects at baseline, mid-point of therapy, and end-of-therapy

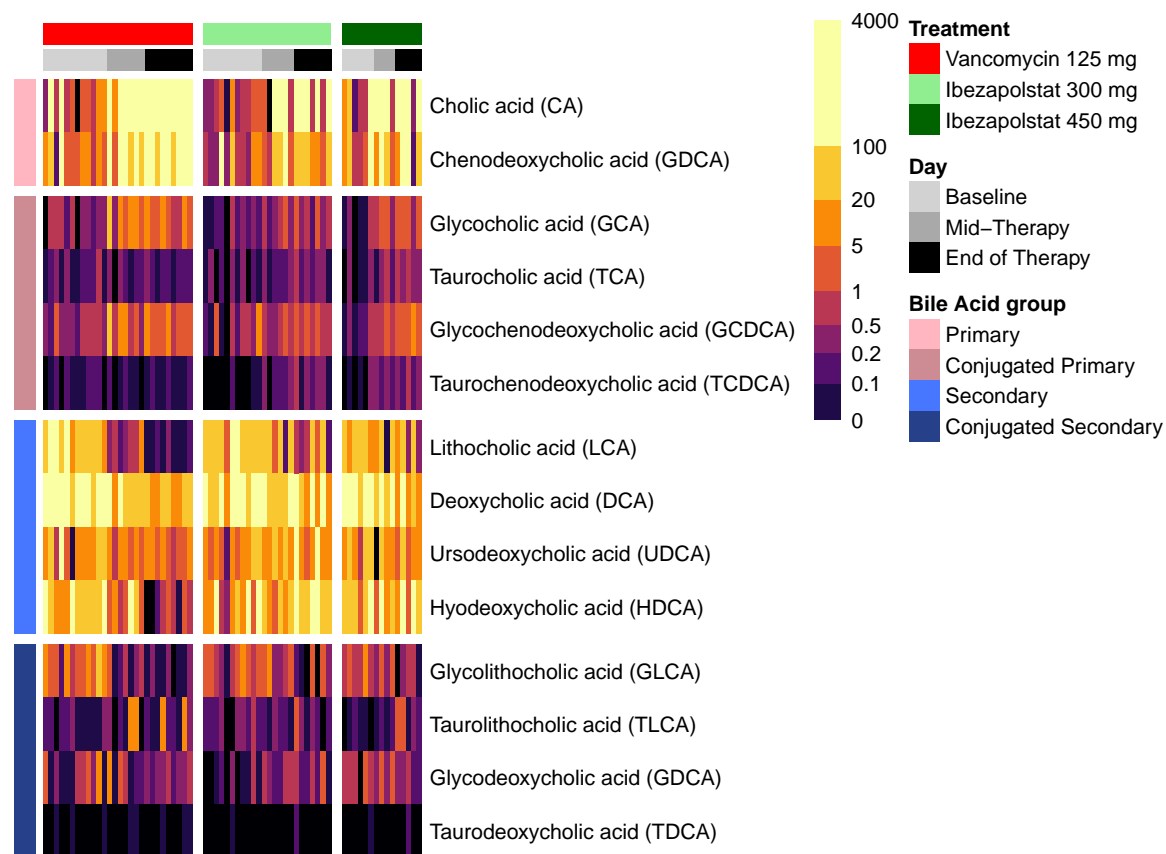

Supplement: aac.02244-21-s0001.pdf [file aac.02244-21-s0001.pdf]
